# Supplementary material for: SYSU-6, A New 2-D Aluminophosphate Zeolite Layer Precursor
Source: MDPI journal article supplement (doi:10.3390/molecules24162972), 2019-08-16
Supplement: s1 [file s1]

Supporting Information

## SYSU-6, A new 2-D Aluminophosphate Zeolite Layer Precursor

Jiang-Zhen Qiu, Long-Fei Wang, Jiuxing Jiang\*

MOE Key Laboratory of Bioinorganic and Synthetic Chemistry, School of Chemistry, Sun Yat-sen University, Guangzhou, 510275, P. R. China. E-mail: jiangjiux@mail.sysu.edu.cn

Correspondence: jiangjiux@mail.sysu.edu.cn; Tel.: +86-20-84111355

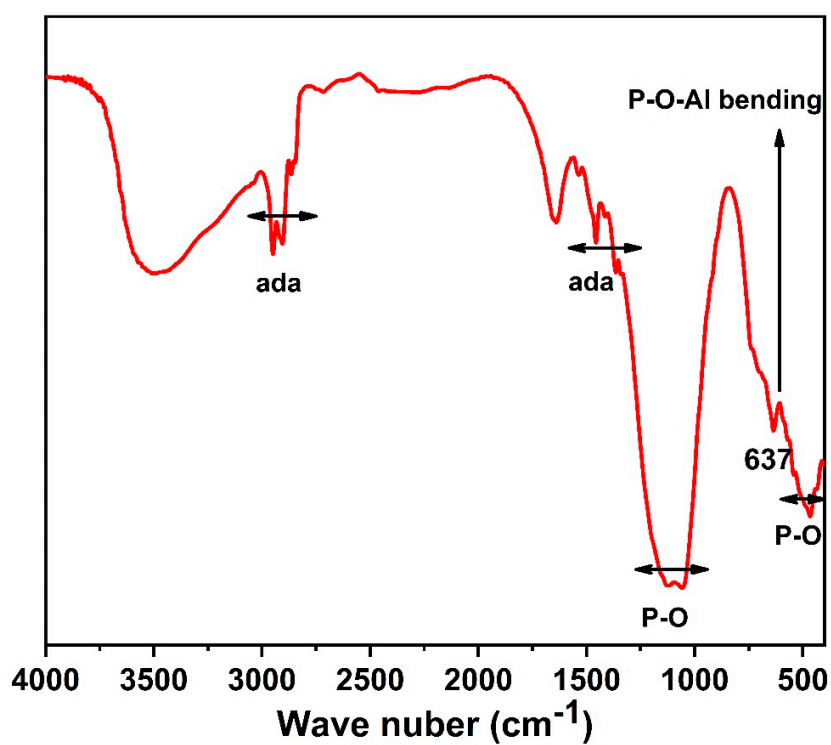

**Figure S1.** IR spectrum of SYSU-6 with the range of 400-4000 cm<sup>-1</sup>.

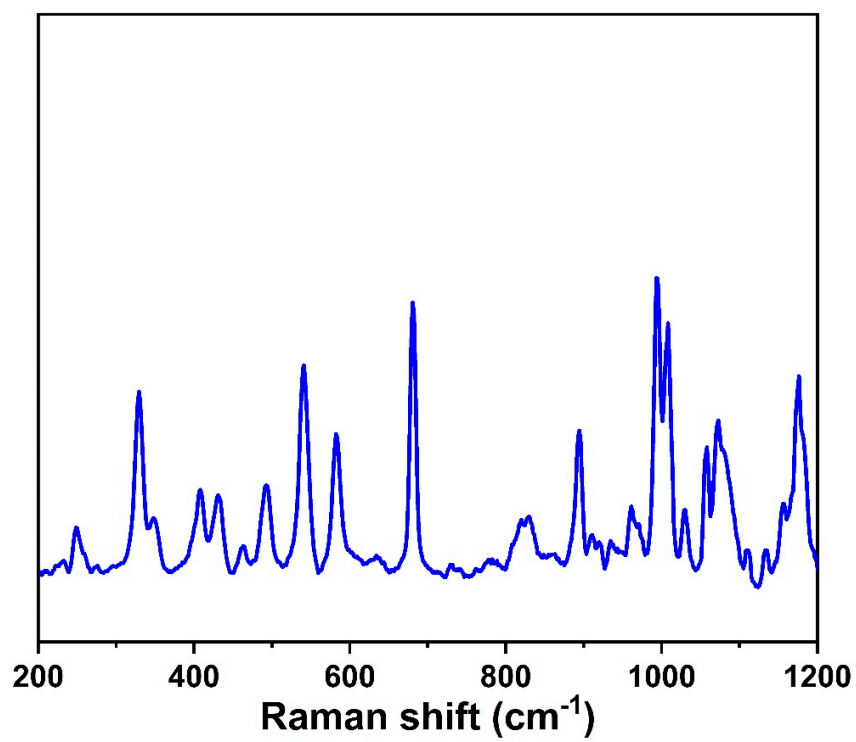

**Figure S2.** UV Raman spectrum excited with 325 nm of SUSY-6 with the range of 200–1200  $\text{cm}^{-1}$ .

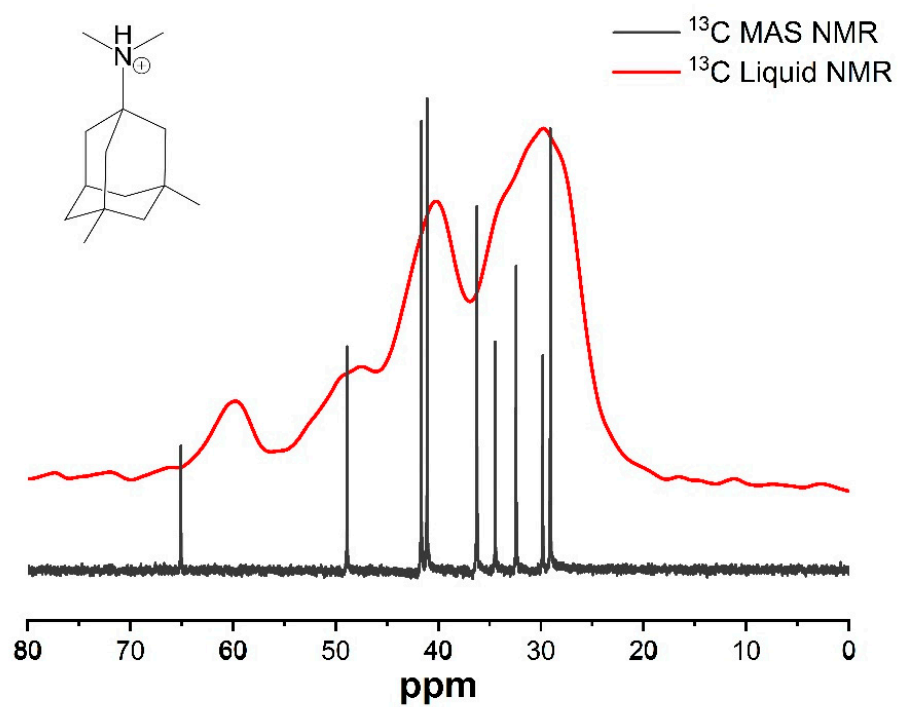

**Figure S3.** The solid-state  $^{13}\text{C}$  MAS NMR of SYSU-6 and the  $^{13}\text{C}$  Liquid NMR of synthetic protonated N,N,3,5-tetramethyladamantan-1-amine dissolved with concentrated HCl aqueous solution.
